# Supplementary material for: Measurement of person-centred consultation skills among healthcare practitioners: a systematic review of reviews of validation studies
Source: Research Square preprint supplement (doi:10.21203/rs.3.rs-1661398/v1), 2022-07-14
Supplement: Supplementary file 2 [file 4098d0a6a1a464dc981fa491.docx]

*Table 6: Reported measurement properties of instruments*

|  |  |  | Reliability | | | Validity | | | | | | | | | | | |
| --- | --- | --- | --- | --- | --- | --- | --- | --- | --- | --- | --- | --- | --- | --- | --- | --- | --- |
| Instrument | **Abbreviation** | **Review** | **Internal consistency** | **Test-retest** | **Inter-rater** | **Content** | **Structural** | **Construct** | **Convergent** | **Factor analysis** | **Known groups** | **Criterion** | **Cross-cultural** | **Face** | **Discriminant** | **Predictive** | **Concurrent** |
| BPS tool | BPS tool | Brouwers | 🗸 |  |  | 🗸 | 🗸 |  |  |  |  |  |  |  |  |  |  |
| Burgoon and Hale Relational Communication Scale for Observational Measurement (Adapted version) | RCS-O | Ekman | 🗸 |  | 🗸 |  |  |  |  |  |  |  |  |  |  |  | 🗸 |
| CARES Observational tool | COT | Ekman |  |  | 🗸 | 🗸 |  |  |  |  |  |  |  | 🗸 |  |  |  |
| Client-Centred Care Questionnaire | CCCQ | Koberich | 🗸 |  |  |  | 🗸 | 🗸 | 🗸 | 🗸 | 🗸 |  |  |  |  |  |  |
| Common Ground | CG | Brouwers | 🗸 | 🗸 |  |  | 🗸 |  |  |  |  | 🗸 |  |  |  |  |  |
| Components of Primary Care Instrument | CPCI | Hudon | 🗸 |  |  | 🗸 |  |  |  |  |  |  |  |  |  | 🗸 |  |
| Consultation and Relational Empathy | CARE | Hudon & Brouwers | 🗸 |  |  | 🗸 |  |  |  |  |  | 🗸 |  | 🗸 |  | 🗸 | 🗸 |
| Consultation Care Measure | CCM | Hudon | 🗸 |  |  |  |  |  |  |  |  |  |  |  |  |  |  |
| Davis Observation Code (modified version) | DOC | Ekman |  |  |  |  |  |  |  |  |  |  |  |  |  |  |  |
| Detail of Essential Elements and Participants in Shared Decision Making | DEEP-SDM | Ekman |  |  |  |  |  |  |  |  |  |  |  |  |  |  |  |
| Four Habits Coding Scheme | 4HCS | Ekman | 🗸 |  | 🗸 |  |  |  |  |  |  |  |  |  |  |  | 🗸 |
| General Practice Assessment Survey | GPAS | Hudon | 🗸 | 🗸 |  |  |  |  |  |  |  |  |  |  | 🗸 |  |  |
| Henbest and Stewart instrument | Henbest and Stewart | Ekman |  | 🗸 | 🗸 |  |  |  |  |  |  |  |  |  |  |  |  |
| Individualized Care Scale (4th version) – English version (Canada) (Petroz et al. 2011) | ICS | Koberich | 🗸 |  |  |  | 🗸 | 🗸 |  | 🗸 |  |  | 🗸 |  |  |  |  |
| Individualized Care Scale (4th version) – Finnish, Greek, Swedish and English version (Suhonen et al. 2010) | ICS | Koberich | 🗸 |  |  |  | 🗸 | 🗸 | 🗸 | 🗸 |  |  |  |  |  |  |  |
| Individualized Care Scale (4th version) – Turkish version (Acaroglu et al. 2011) | ICS | Koberich | 🗸 |  |  |  | 🗸 | 🗸 |  | 🗸 |  |  |  |  |  |  |  |
| Informed Decision Making instrument | IDM | Ekman |  |  | 🗸 |  |  |  |  |  |  |  |  |  |  |  |  |
| Instrument on Doctor-Patient Communication Skills | IDPCS | Hudon | 🗸 |  |  |  |  |  |  | 🗸 |  |  |  | 🗸 |  |  |  |
| Interpersonal Processes of Care | IPC | Hudon | 🗸 |  |  |  |  |  |  |  |  |  |  |  |  |  |  |
| Interpersonal Skills Rating Scale | IPS | Brouwers | 🗸 |  | 🗸 |  | 🗸 |  |  | 🗸 |  |  |  |  |  |  |  |
| Little instrument | Little instrument | Brouwers | 🗸 |  |  |  | 🗸 |  |  | 🗸 |  |  |  |  |  |  |  |
| Measure of Patient-Centered Communication (Modified version) | MPCC | Ekman | 🗸 |  | 🗸 | 🗸 |  |  |  |  |  |  |  |  |  |  | 🗸 |
| Medical Communication Competence Scale | MCCS | Hudon | 🗸 |  |  |  |  |  |  |  |  |  |  |  |  |  |  |
| Nonverbal Accommodation Analysis System | NAAS | Ekman |  | 🗸 | 🗸 | 🗸 |  |  |  |  |  |  |  |  |  |  | 🗸 |
| North Worcestershire Vocational Training Scheme Patient Satisfaction Questionnaire | NWVTS-PSC | Brouwers | 🗸 |  |  | 🗸 |  |  |  |  |  |  |  |  |  |  |  |
| Observing Patient Involvement | OPTION | Ekman | 🗸 | 🗸 | 🗸 | 🗸 |  |  |  |  | 🗸 |  |  |  |  |  |  |
| Oncology Patients’ Perceptions of the Quality of Nursing Care Scale | OPPQNCS | Koberich | 🗸 |  |  |  | 🗸 | 🗸 |  | 🗸 |  |  |  |  |  |  |  |
| Oncology Patients’ Perceptions of the Quality of Nursing Care Scale - Finnish version (Suhonen et al. 2007a,b) | OPPQNCS | Koberich | 🗸 |  |  |  |  | 🗸 | 🗸 |  |  |  |  |  |  |  |  |
| Oncology Patients’ Perceptions of the Quality of Nursing Care Scale - Short form – Turkish version (Can et al. 2008) | OPPQNCS | Koberich | 🗸 |  |  |  |  |  |  |  |  |  |  |  |  |  |  |
| Patient Feedback Questionnaire on Communication Skills | PFC | Brouwers | 🗸 |  |  | 🗸 | 🗸 |  |  | 🗸 |  |  |  |  |  |  |  |
| Patient Perception of Patient Centeredness | PPPC | Brouwers | 🗸 |  |  | 🗸 |  |  |  |  |  | 🗸 |  |  |  |  |  |
| Patient Perception of Patient Centeredness (13 items) | PPPC | Hudon | 🗸 |  |  |  |  |  |  |  |  |  |  |  |  |  |  |
| Patient Perception of Quality | PPQ | Hudon | 🗸 |  |  |  |  |  |  | 🗸 |  |  |  |  | 🗸 |  |  |
| Patient Reactions Assessment | PRA | Hudon | 🗸 |  |  |  |  |  |  | 🗸 |  |  |  | 🗸 | 🗸 |  |  |
| Patient-Centred behaviour coding instrument | PBCI | Ekman | 🗸 |  | 🗸 |  |  |  |  |  |  |  |  |  |  |  | 🗸 |
| Patient-Centred Observation Form | PCOF | Brouwers & Ekman | 🗸 | 🗸 | 🗸 |  |  |  |  |  |  |  |  |  |  |  |  |
| Perceived Involvement in Care Scale | PICS | Hudon | 🗸 |  |  |  |  |  |  | 🗸 |  |  |  |  |  | 🗸 |  |
| Perceived Involvement in Care Scale (Modified version) | M-PICS | Brouwers | 🗸 |  |  |  | 🗸 |  |  |  |  |  | 🗸 |  |  |  |  |
| Primary Care Assessment Survey | PCAS | Hudon | 🗸 |  |  |  |  |  |  |  |  |  |  |  |  |  |  |
| Primary Care Assessment Tool | PCAT-A | Hudon | 🗸 |  |  |  |  |  |  |  |  |  |  |  |  |  |  |
| Process of Interactional Sensitivity Coding in Healthcare | PISCH | Ekman |  |  | 🗸 |  |  |  |  |  |  |  |  | 🗸 |  |  |  |
| Quality of Communication | QoC | Brouwers | 🗸 |  |  |  | 🗸 |  |  |  |  |  |  |  |  |  |  |
| Questionnaire on the Quality of Physician–Patient Interaction | QQPPI | Brouwers | 🗸 | 🗸 |  | 🗸 | 🗸 |  |  | 🗸 |  |  |  |  |  |  |  |
| Revised Patient-Centred Communication and Interpersonal Skills Scale | RUCIS | Brouwers |  |  |  |  |  |  |  |  |  |  |  |  |  |  |  |
| Rochester Participatory Decision-Making Scale | RPAD | Ekman |  |  | 🗸 |  |  |  |  |  |  |  |  |  |  |  | 🗸 |
| Roter Interaction Analysis System (Modified version) | ARCS (RIAS) | Ekman |  |  | 🗸 |  |  |  |  |  |  |  |  |  |  |  | 🗸 |
| Sherbrooke Observation Scale of Patient-Centered Care | SOS-PCC | Ekman | 🗸 |  | 🗸 | 🗸 |  |  |  |  |  |  |  |  |  |  |  |
| Smoliner scale | Smoliner scale | Koberich | 🗸 |  |  |  |  |  | 🗸 |  | 🗸 |  |  |  |  |  |  |
